# Supplementary material for: A laboratory study on the effects of wind turbine noise on sleep: results of the polysomnographic WiTNES study
Source: PubMed Central journal article supplement — Sleep. 2020 Mar 25;43(9):zsaa046. doi: 10.1093/sleep/zsaa046 (PMC7487868; doi:10.1093/sleep/zsaa046), 2020-03-25
Supplement: zsaa046_suppl_supplementary_material.pdf [file zsaa046_suppl_supplementary_material.pdf]

# SUPPLEMENTARY MATERIALS FOR “A LABORATORY STUDY ON THE EFFECTS OF WIND TURBINE NOISE ON SLEEP: RESULTS OF THE POLYSOMNOGRAPHIC WITNES STUDY”

Michael G. Smith<sup>1,a</sup>, Mikael Ögren<sup>1</sup>, Pontus Thorsson<sup>2,3</sup>, Laith Hussain-Alkhateeb<sup>1</sup>, Eja Pedersen<sup>4</sup>, Jens Forssén<sup>2</sup>, Julia Ageborg Morsing<sup>1</sup> and Kerstin Persson Waye<sup>1\*</sup>

1. *Department of Occupational and Environmental Medicine, School of Public Health and Community Medicine, Institute of Medicine, The Sahlgrenska Academy, University of Gothenburg, Gothenburg, Sweden*
2. *Division of Applied Acoustics, Department of Civil and Environmental Engineering, Chalmers University of Technology, Gothenburg, Sweden*
3. *Akustikverkstan AB, Lidköping, Sweden*
4. *Department of Architecture and the Built Environment, Lund University, Lund, Sweden*

\* *Corresponding author*

<sup>a</sup> *Current affiliation: University of Pennsylvania Perelman School of Medicine, Division of Sleep and Chronobiology, Unit for Experimental Psychiatry, Philadelphia, USA*

## Supplemental material table of contents

|                                                           |    |
|-----------------------------------------------------------|----|
| Supplemental methods .....                                | 3  |
| Participant recruitment .....                             | 3  |
| Morning questionnaire .....                               | 4  |
| Model checking .....                                      | 7  |
| Sound character period statistical analysis .....         | 7  |
| Supplemental results.....                                 | 8  |
| Participants .....                                        | 8  |
| Correlation analysis of regression model covariates ..... | 10 |
| Sleep macrostructure regression model results .....       | 11 |
| Effect of habitual sleep timing on sleep latency.....     | 12 |
| Cortisol awakening response.....                          | 13 |
| Self-reported.....                                        | 14 |
| Supplemental references.....                              | 19 |

## Figures

|                                                                                                                                                                   |    |
|-------------------------------------------------------------------------------------------------------------------------------------------------------------------|----|
| <b>Figure S1.</b> Interaction between study night and study group for percentage of total sleep time in N3 sleep.....                                             | 12 |
| <b>Figure S2.</b> Cortisol awakening response. ....                                                                                                               | 13 |
| <b>Figure S3.</b> Graphical representation of unadjusted means and standard deviations in <i>Control</i> and <i>WTN-night</i> for each self-reported outcome..... | 14 |

## Tables

|                                                                                                                               |    |
|-------------------------------------------------------------------------------------------------------------------------------|----|
| <b>Table S1.</b> Self-evaluation of bedroom noise environment at home and disturbance by noise. ....                          | 8  |
| <b>Table S2.</b> Medications used by sleep study participants.....                                                            | 9  |
| <b>Table S3.</b> Correlation coefficients for covariates included in regression models.....                                   | 10 |
| <b>Table S4.</b> P-values for all treatment and covariate variables included in regression models of PSG macrostructure. .... | 11 |
| <b>Table S5.</b> Regression model results for effect of study night and study group on cortisol awakening response.....       | 13 |

# Supplemental methods

## Participant recruitment

Two study groups were recruited. One group lived close to wind turbines, and the other group did not live close to wind turbines. The group that did not live close to wind turbines is hereafter termed *Reference*. The group living close to wind turbines was potentially exposed to WTN at home, and is hereafter termed *Exposed*.

We used two approaches to obtain addresses for the recruitment pool of the *Exposed* group. First, we contacted local municipalities for records of complaints made about wind turbines (n=324 addresses). Second, we manually looked up areas throughout Sweden with several wind turbines using a public database maintained by the Swedish Energy Agency (vindlov.se), and obtained the addresses close to wind turbines in these areas from a public population register (n=151 addresses). We mailed a leaflet describing the study and a list of available study periods to all 475 addresses. This mailing included our email, telephone and postal information with which a recipient could contact us for more information and/or if they were interested in taking part. If we did not receive a response, we attempted to contact the recipient by telephone, if a number was available. In this way we successfully contacted 229 individuals (48.2% of all addresses mailed). Eighty individuals (34.9% of those successfully contacted; 16.8% of all mailed addresses) expressed an interest in taking part in the study. Interested respondents were asked a series of questions over the telephone to determine their eligibility for the study. Of those interested, 24 met the inclusion criteria and subsequently completed the study (30% of interested respondents; 10.5% of successfully contacted individuals; 5.1% of all mailed addresses).

We recruited the *Reference* group by two separate advertising strategies. The first was via a physical presence and posters at a large public science festival (n=22 participants recruited). The second was using a digital platform (studentkaninen.se) that has the specific purpose of recruiting research subjects from among the public (n=4 participants recruited). The exclusion criteria were identical to the *Exposed* group, with the exceptions that they should not live close to a wind turbine and were not required to have lived at their current address for at least year.

## Morning questionnaire

Below is the questionnaire that was completed each morning during the study. Note that the original questionnaire was administered in Swedish, and is presented here as an English language translation, the validity of which has not been tested.

### Questions to answer in the morning

Answer the questions within 15 minutes of awakening at 7:00 in the morning

Note that this form is two-sided

1. **How would you rate your sleep quality during the night?** Circle the appropriate number.

Very good 0 1 2 3 4 5 6 7 8 9 10 Very bad

Also give your answer on the following verbal scale

2. **How would you rate your sleep quality during the night?**

- Very good  
 Rather good  
 Not particularly good  
 Bad  
 Very bad

| <b>How are you feeling right now?</b> | <i>Circle the appropriate number</i> |   |   |   |   |   |   |   |   |   |    |            |
|---------------------------------------|--------------------------------------|---|---|---|---|---|---|---|---|---|----|------------|
| 3. Very rested                        | 0                                    | 1 | 2 | 3 | 4 | 5 | 6 | 7 | 8 | 9 | 10 | Very tired |
| 4. Very relaxed                       | 0                                    | 1 | 2 | 3 | 4 | 5 | 6 | 7 | 8 | 9 | 10 | Very tense |
| 5. Very irritated                     | 0                                    | 1 | 2 | 3 | 4 | 5 | 6 | 7 | 8 | 9 | 10 | Very glad  |

6. **How long did it take you to fall asleep last night?** Minutes: \_\_\_\_\_
7. **How many times do you estimate that you woke up during the night before the morning alarm?**  Did not wake Woke \_\_\_\_ times
8. **Did you have difficulty falling back to sleep after an awakening?**  Did not wake  No  Yes

**How was your experience of the night and your sleep?***Circle the appropriate number*

|     |                         |   |   |   |   |   |   |   |   |   |   |    |                          |
|-----|-------------------------|---|---|---|---|---|---|---|---|---|---|----|--------------------------|
| 9.  | Easy to fall asleep     | 0 | 1 | 2 | 3 | 4 | 5 | 6 | 7 | 8 | 9 | 10 | Difficult to fall asleep |
| 10. | Better sleep than usual | 0 | 1 | 2 | 3 | 4 | 5 | 6 | 7 | 8 | 9 | 10 | Worse sleep than usual   |
| 11. | Deep sleep              | 0 | 1 | 2 | 3 | 4 | 5 | 6 | 7 | 8 | 9 | 10 | Shallow sleep            |
| 12. | Never woke up           | 0 | 1 | 2 | 3 | 4 | 5 | 6 | 7 | 8 | 9 | 10 | Woke up often            |

13. **How disturbed was your sleep by *noise* from wind turbines during the night?** *Circle the appropriate number*

Not at all 0 1 2 3 4 5 6 7 8 9 10 Extremely

**Do you think that *noise* during the night disturbed your sleep so that you:**

|                                    | Not at all | Slightly | Moderately | Very | Extremely |
|------------------------------------|------------|----------|------------|------|-----------|
| 14. slept badly?                   | [ ]        | [ ]      | [ ]        | [ ]  | [ ]       |
| 15. were awoken?                   | [ ]        | [ ]      | [ ]        | [ ]  | [ ]       |
| 16. had difficulty falling asleep? | [ ]        | [ ]      | [ ]        | [ ]  | [ ]       |
| 17. felt tired in the morning?     | [ ]        | [ ]      | [ ]        | [ ]  | [ ]       |

**Here are two columns of words describing different emotional states.**

Circle the answer that best describes how you feel right now.

Work quickly and respond with the option you first come upon!

*Respond for every word*

Key:  ++ Definitely     + Somewhat     - Not     -- Definitely not

|  | Agree.....    | Def | Some | Not | Def not |  | Agree.....     | Def | Some | Not | Def not |
|--|---------------|-----|------|-----|---------|--|----------------|-----|------|-----|---------|
|  | Sullen        | ++  | +    | -   | --      |  | Generous       | ++  | +    | -   | --      |
|  | Pleased       | ++  | +    | -   | --      |  | Optimistic     | ++  | +    | -   | --      |
|  | Helpful       | ++  | +    | -   | --      |  | Pessimistic    | ++  | +    | -   | --      |
|  | Unreasonable  | ++  | +    | -   | --      |  | Uneasy         | ++  | +    | -   | --      |
|  | Accommodating | ++  | +    | -   | --      |  | Unhappy        | ++  | +    | -   | --      |
|  | Glad          | ++  | +    | -   | --      |  | In good humour | ++  | +    | -   | --      |
|  | Friendly      | ++  | +    | -   | --      |  | Co-operative   | ++  | +    | -   | --      |
|  | Cross         | ++  | +    | -   | --      |  | Worried        | ++  | +    | -   | --      |
|  | Dejected      | ++  | +    | -   | --      |  | Irritated      | ++  | +    | -   | --      |
|  | Good natured  | ++  | +    | -   | --      |  | Resigned       | ++  | +    | -   | --      |
|  | Harmonic      | ++  | +    | -   | --      |  | Angry          | ++  | +    | -   | --      |
|  |               |     |      |     |         |  | Unconcerned    | ++  | +    | -   | --      |

**Now you are done with the morning's questions!**

## Model checking

To ensure conformity with the regression model assumptions of normality, data were visually inspected. If appropriate, data were transformed prior to statistical analysis. Sleep onset latency (SOL), N3 latency, wakefulness after sleep onset (WASO) and total sleep time (TST) data were substantially positively skewed and were therefore log-transformed. REM latency, number of awakenings during the night and awakening frequency per hour were slightly positively skewed and so were square-root transformed.

## Sound character period statistical analysis

The following PSG data were calculated for each of the 2-hour sound character periods: sleep time (minutes); amount of each sleep stage during the sound character period as a proportion of time asleep in the sounds character period (%); frequency of SSCs, awakenings, arousals and combined EEG reactions (n/h). Each of these outcomes was analyzed separately in a multilevel mixed regression model (SPSS MIXED procedure) with a random subject intercept. The models included Window (Closed/Ajar) and AM depth as the treatment variables of interest. Furthermore, candidate variables to include in these models were the covariates included in analysis of sleep macrostructure (study group, sex, noise sensitivity, age) and the window\*AM interaction. The presentation number of the sound character period (ordinal: 1, 2, 3, 4) was also considered as a candidate variable, since sleep structure changes over the course of the night. Because of the rather limited sample size (n=48 participants with PSG data), to minimize the risk of overfitting we aimed to limit the number of candidate variables in each model. We therefore used a purposeful stepwise selection of covariates using the following approach:

1. In addition to Window and AM depth, candidate variables were included one at a time.
  - If candidate variable  $p \leq 0.250$  then include in multiple regression in step 2.
  - If candidate variable  $p > 0.250$  then put on a list for later double check (\*)
2. Run a multiple regression with the variables from step 1.
3. Delete candidate variables from the model that seem “unimportant” ( $p > 0.250$ ).
4. Compare the smaller and the larger model using the Akaike Information Criterion (AIC) values.<sup>1</sup> We used the model that most plausibly fit the data according to difference in the AIC following recommendations by Burnham and Anderson.<sup>2</sup> If the difference in AIC was  $> 2$ , we used the model with the lowest AIC. If the difference in AIC values was  $< 2$ , we used the most parsimonious model.
5. Repeat step 3 and 4 until the model consists of only “important” variables (no difference between larger and smaller models).
6. Reinsert, one at the time, of the variables rejected at step 1 (\*) into the resulting multiple model from the previous step. The variable is checked for statistical significance ( $p < 0.05$ ).
7. Include all the extra variables statistically significant in step 6 one-at-the-time in the multiple model from step 5.  
Any variable that then loses its statistical significance ( $p > 0.05$ ) are again excluded and the resulting model is compared via the AIC with the larger model from step 7.
8. Insert the Window\*AM depth interaction into the resulting multiple model from step 7. We retained the interaction in the model if the F-test was statistically significant ( $p \leq 0.10$ ).

# Supplemental results

## Participants

On the first evening of the study, participants were asked to rate the noise environment in their bedroom at home, and their disturbance at home by different noise sources. The number of responses for each response level of each question is given in Table S1. We used Fisher's exact test of independence to test if the distribution of responses for each question was different between the *Reference* and *Exposed* study groups. Data are missing completely for n=1 participant who did not complete the questionnaire and n=3 participants who completed only the first side of the questionnaire.

**Table S1.** Self-evaluation of bedroom noise environment at home and disturbance by noise.

| Question                                      | Response level             | Study group      |                | p-value       |
|-----------------------------------------------|----------------------------|------------------|----------------|---------------|
|                                               |                            | <i>Reference</i> | <i>Exposed</i> |               |
| Self-reported bedroom noise environment       | Very quiet                 | 6                | 6              | n=49, p=1.0   |
|                                               | Rather quiet               | 17               | 16             |               |
|                                               | Not very quiet             | 2                | 1              |               |
|                                               | Rather noisy               | 0                | 1              |               |
|                                               | Very noisy                 | 0                | 0              |               |
| Disturbed at home by road noise               | Not at all                 | 16               | 9              | n=46, p=0.174 |
|                                               | Not very much              | 7                | 12             |               |
|                                               | Quite a lot                | 1                | 1              |               |
|                                               | A lot                      | 0                | 0              |               |
|                                               | Incredibly so              | 0                | 0              |               |
| Disturbed at home by rail noise               | Not at all                 | 22               | 21             | n=46, p=1.0   |
|                                               | Not very much              | 2                | 1              |               |
|                                               | Quite a lot                | 0                | 0              |               |
|                                               | A lot                      | 0                | 0              |               |
|                                               | Incredibly so              | 0                | 0              |               |
| Disturbed at home by fridge/fan noise         | Not at all                 | 10               | 11             | n=46, p=0.543 |
|                                               | Not very much              | 12               | 10             |               |
|                                               | Quite a lot                | 2                | 0              |               |
|                                               | A lot                      | 0                | 1              |               |
|                                               | Incredibly so              | 0                | 0              |               |
| Disturbed at home by neighbor noise           | Not at all                 | 8                | 13             | n=46, p=0.223 |
|                                               | Not very much              | 14               | 7              |               |
|                                               | Quite a lot                | 2                | 2              |               |
|                                               | A lot                      | 0                | 0              |               |
|                                               | Incredibly so              | 0                | 0              |               |
| Disturbed at home by noise from other sources | Not at all                 | 4                | 4              | n=24, p=0.661 |
|                                               | Not very much              | 3                | 2              |               |
|                                               | Quite a lot <sup>a</sup>   | 6                | 3              |               |
|                                               | A lot <sup>b</sup>         | 0                | 1              |               |
|                                               | Incredibly so <sup>c</sup> | 0                | 1              |               |

<sup>a</sup> Sources of disturbance given: Pets (×2), plumbing system, beeping, children (×3), gardening equipment, bird song (×2), heaters; <sup>b</sup> Source of disturbance given: Radiator; <sup>c</sup> Source of disturbance given: Snoring partner



Seventeen participants (34%) were using medications during the study (9 in the *Reference* group, 8 in the *Exposed* Group). The different medications used and the number of participants using each type of medication is given in Table S2. Nine participants used only one medication, three participants used two different medications, two participants used three different medications, and two participants used four different medications.

**Table S2.** Medications used by sleep study participants.

| Medication type                             | Generic/brand name<br>(if reported) | Users (n) |                           |                         | Frequency of side effects<br>on sleep <sup>a</sup> |
|---------------------------------------------|-------------------------------------|-----------|---------------------------|-------------------------|----------------------------------------------------|
|                                             |                                     | Total     | <i>Reference</i><br>group | <i>Exposed</i><br>group |                                                    |
| ACE inhibitor                               | Enalapril                           | 1         | 1                         | 0                       | Uncommon (up to 1/100)                             |
| Aminosalicilate                             | Asacol                              | 1         | 1                         | 0                       | -                                                  |
| Angiotensin II receptor antagonist          | Losartan                            | 1         | 1                         | 0                       | Uncommon (up to 1/100)                             |
| Anticoagulant                               | Eliquis, Waran                      | 2         | 1                         | 1                       | -                                                  |
| Antidepressant (SSRI)                       | Brintellix, Sertralin               | 3         | 1                         | 2                       | Very common (more than 1/10)                       |
| Antihistamine                               | Loratadine                          | 1         | 1                         | 0                       | Frequency not reported                             |
| Beta-agonist                                | Bricanyl                            | 1         | 1                         | 0                       | Occurring with unknown frequency                   |
| Beta-blocker                                | Metoprolol, Bisoprolol              | 2         | 1                         | 1                       | Uncommon (up to 1/100)                             |
| Bronchodilator                              | Spiriva                             | 1         | 0                         | 1                       | Rare (up to 1/1000)                                |
| Calcium channel blocker                     | Amlodipin                           | 1         | 1                         | 0                       | -                                                  |
| Corticosteroid                              | Mometason evolan                    | 1         | 1                         | 0                       | -                                                  |
| Dietary supplements                         | -                                   | 1         | 0                         | 1                       | -                                                  |
| Estrogen/progestin (Female HRT)             | -                                   | 1         | 0                         | 1                       | -                                                  |
| Ferrus sulphate                             | Duroferon                           | 1         | 1                         | 0                       | -                                                  |
| Insulin                                     | Lantus, Novorapid                   | 1         | 1                         | 0                       | -                                                  |
| Nonsteroidal anti-inflammatory drug (NSAID) | Trombyl                             | 2         | 0                         | 2                       | -                                                  |
| Proton pump inhibitor                       | Omeprazol                           | 2         | 1                         | 1                       | Uncommon (up to 1/100)                             |
| Retinoid                                    | Neotigason                          | 1         | 0                         | 1                       | -                                                  |
| Statin                                      | Simvastatin                         | 1         | 0                         | 1                       | Very rare                                          |
| Thyroid hormone                             | Levaxin                             | 3         | 3                         | 0                       | -                                                  |
| Vitamin D supplement                        | -                                   | 1         | 1                         | 0                       | -                                                  |

ACE: Angiotensin-converting enzyme; SSRI: selective serotonin reuptake inhibitors; HRT: Hormone replacement therapy.

<sup>a</sup> Data from the Swedish Association of the Pharmaceutical Industry <sup>3</sup>

## Correlation analysis of regression model covariates

To confirm there were no potential issues with multicollinearity, all covariates included in the regression models were examined in a correlation analysis. Correlation coefficients were calculated appropriately to the type of variables (dichotomous, ordinal or continuous) being correlated. Results are given in Table S3. All correlations were weak ( $r < 0.4$ ) and therefore no covariates were omitted from regression analyses.

**Table S3.** Correlation coefficients for covariates included in regression models.

|                           | Age | Sex                | Study group      | Noise sensitivity | Tiredness          | Difficulty falling asleep |
|---------------------------|-----|--------------------|------------------|-------------------|--------------------|---------------------------|
| Age                       | 1   | $r_{pb} = -0.0856$ | $r_{pb} = 0.055$ | $r = 0.291$       | $\rho = 0.107$     | $\rho = 0.076$            |
| Sex                       | -   | 1                  | $\phi = 0.077$   | $r_{pb} = 0.209$  | $r_{rb} = 0.0661$  | $r_{rb} = 0.111$          |
| Study group               | -   | -                  | 1                | $r_{pb} = 0.150$  | $r_{rb} = 0.355^*$ | $r_{rb} = 0.215$          |
| Noise sensitivity         | -   | -                  | -                | 1                 | $\rho = 0.340^*$   | $\rho = 0.135$            |
| Tiredness                 | -   | -                  | -                | -                 | 1                  | $\rho = 0.149$            |
| Difficulty falling asleep | -   | -                  | -                | -                 | -                  | 1                         |

$r$  Pearson correlation;  $\rho$  Spearman rank correlation;  $r_{pb}$  point-biserial correlation;  $r_{rb}$  rank-biserial correlation;  $\phi$  phi correlation. Statistically significant correlations are indicated with asterisks: \*  $p < 0.05$

## Sleep macrostructure regression model results

P-values for all variables included in the mixed effects regression model for each PSG outcome variables are given in Table S4. There was a significant interaction between study night (Control/WTN-night) and study group (Reference/Exposed) for the percentage of sleep time in N3 sleep (Figure S1).

**Table S4.** P-values for all treatment and covariate variables included in regression models of PSG macrostructure. P-values are from analysis where variables were transformed if appropriate.

| Variable category   | Variable                            | P-values    |             |                   |        |       |               |
|---------------------|-------------------------------------|-------------|-------------|-------------------|--------|-------|---------------|
|                     |                                     | Study night | Study group | Noise sensitivity | Sex    | Age   | Night × Group |
| Sleep times         | TIB (min)                           | 0.354       | 0.213       | 0.175             | 0.142  | 0.514 | 0.354         |
|                     | TST (min) *                         | 0.126       | 0.172       | 0.232             | 0.041  | 0.378 | 0.543         |
|                     | Sleep period time (min)             | 0.061       | 0.290       | 0.149             | 0.134  | 0.358 | 0.179         |
|                     | Sleep efficiency (%)                | 0.195       | 0.115       | 0.236             | 0.040  | 0.244 | 0.483         |
|                     | Sleep onset latency (min) *         | 0.211       | 0.147       | 0.197             | 0.497  | 0.312 | 0.165         |
|                     | REM latency (min) †                 | 0.039       | 0.643       | 0.091             | 0.288  | 0.963 | 0.594         |
|                     | N3 latency (min) *                  | 0.195       | 0.812       | 0.409             | 0.298  | 0.284 | 0.136         |
|                     | WASO (min) *                        | 0.222       | 0.643       | 0.801             | 0.049  | 0.008 | 0.500         |
| Sleep architecture  | N1 (min)                            | 0.769       | 0.176       | 0.699             | 0.014  | 0.248 | 0.392         |
|                     | N2 (min)                            | 0.859       | 0.063       | 0.961             | 0.195  | 0.481 | 0.082         |
|                     | N3 (min)                            | 0.910       | 0.700       | 0.069             | 0.251  | 0.523 | 0.062         |
|                     | REM (min)                           | 0.013       | 0.605       | 0.958             | 0.011  | 0.390 | 0.607         |
|                     | NREM (min)                          | 0.947       | 0.332       | 0.207             | 0.495  | 0.624 | 0.232         |
|                     | N1 (% of TST)                       | 0.846       | 0.107       | 0.947             | 0.003  | 0.179 | 0.476         |
|                     | N2 (% of TST)                       | 0.225       | 0.090       | 0.490             | 0.635  | 0.809 | 0.083         |
|                     | N3 (% of TST)                       | 0.280       | 0.387       | 0.210             | 0.744  | 0.681 | 0.034         |
|                     | REM (% of TST)                      | 0.010       | 0.894       | 0.673             | 0.047  | 0.613 | 0.354         |
|                     | NREM (% of TST)                     | 0.010       | 0.894       | 0.673             | 0.047  | 0.613 | 0.354         |
| Sleep fragmentation | Arousals (n)                        | 0.733       | 0.852       | 0.938             | 0.063  | 0.167 | 0.283         |
|                     | Arousal index (n/h)                 | 0.945       | 0.997       | 0.704             | 0.020  | 0.133 | 0.268         |
|                     | Awakenings (n) †                    | 1.000       | 0.256       | 0.688             | 0.311  | 0.026 | 0.207         |
|                     | Awakening index (n/h) †             | 0.622       | 0.211       | 0.545             | 0.197  | 0.043 | 0.288         |
|                     | Combined arousals+awakenings (n)    | 0.769       | 0.991       | 0.897             | 0.048  | 0.286 | 0.230         |
|                     | Sleep fragmentation index (n/h)     | 0.850       | 0.844       | 0.638             | 0.014  | 0.237 | 0.230         |
|                     | SSCs (n)                            | 0.959       | 0.760       | 0.912             | 0.002  | 0.216 | 0.079         |
|                     | SSC index (n/h)                     | 0.414       | 0.883       | 0.646             | <0.001 | 0.156 | 0.196         |
| Sleep continuity    | First awakening (min)               | 0.309       | 0.937       | 0.019             | 0.023  | 0.859 | 0.540         |
|                     | Final awakening (min)               | 0.214       | 0.531       | 0.255             | 0.114  | 0.902 | 0.595         |
|                     | Max uninterrupted time in W (min)   | 0.768       | 0.144       | 0.103             | 0.117  | 0.972 | 0.435         |
|                     | Max uninterrupted time in REM (min) | 0.106       | 0.858       | 0.957             | 0.023  | 0.209 | 0.590         |
|                     | Max uninterrupted time in N1 (min)  | 0.183       | 0.052       | 0.741             | 0.697  | 0.988 | 0.839         |
|                     | Max uninterrupted time in N2 (min)  | 0.448       | 0.950       | 0.297             | 0.117  | 0.163 | 0.419         |
|                     | Max uninterrupted time in N3 (min)  | 0.587       | 0.037       | 0.353             | 0.074  | 0.739 | 0.974         |

\* Log-transformed before analysis. † Square-root transformed before analysis.

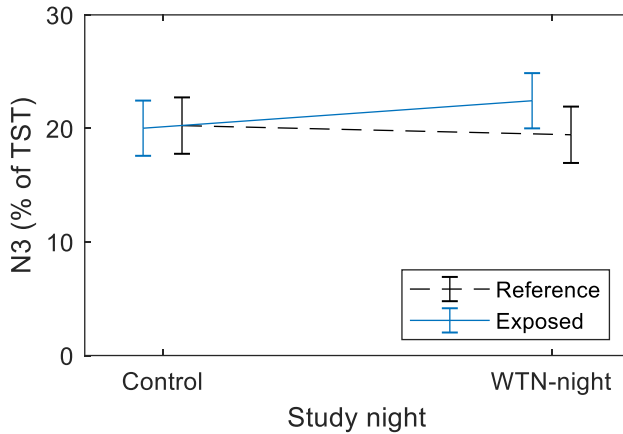

**Figure S1.** Interaction between study night and study group for percentage of total sleep time (TST) in N3 sleep. Data from N=24 participants per night per study group. Error bars indicate 95% confidence intervals.

### Effect of habitual sleep timing on sleep latency

We ran a linear mixed model with random intercept to check if there was an effect of habitual bedtime at home on the PSG sleep timing variables measured in the study (sleep onset latency SOL, N3 latency, REM latency). The residuals for SOL and N3 latency were positively skewed, so these variables were log-transformed before analysis. The model included self-reported habitual bedtime (hour) as a continuous covariate, and was adjusted for study night (*WTN-night/Control*), study group (*Reference/Exposed*), and sex. We initially included the study night×study group interaction term, but this did not contribute significantly to the model (SOL: night×study  $p=0.361$ ; N3 latency: night×study  $p=0.582$ ; REM latency: night×study  $p=0.888$ ) and was therefore omitted. Person nights where participants were already asleep at the 23:00 scheduled lights out time ( $n=11$  nights from 9 participants) were excluded, thus sleep timing data of 85 nights from 46 participants were analyzed. There was no statistically significant effect of habitual bed time on SOL ( $p=0.092$ ), N3 latency ( $p=0.892$ ) or REM latency ( $p=0.811$ ).

## Cortisol awakening response

The mean cortisol concentration at 0, 30 and 45 minutes after awakening is given in Figure S2. Results of regression models of the cortisol awakening response (CAR) are given in Table S5. There were no significant study group  $\times$  study night interactions for any CAR measures. There were no significant effects of study night, study group or noise sensitivity for any CAR measures. In the model for ACOR, there was a significant effect of measurement time ( $p < 0.0001$ , Figure S2). Post-hoc tests with Bonferroni adjustments for multiple testing indicated ACOR was higher than the awakening value after 30 minutes (estimated marginal mean (EMM)  $+0.20 \mu\text{g/dL}$ ,  $p < 0.0001$ ). Fifteen minutes later (45 minutes after awakening), had decreased to a level below the 30 minute measurement (EMM  $-0.09 \mu\text{g/dL}$ ,  $p = 0.0003$ ), yet remained higher than the awakening value (EMM  $+0.11 \mu\text{g/dL}$ ,  $p < 0.0001$ ).

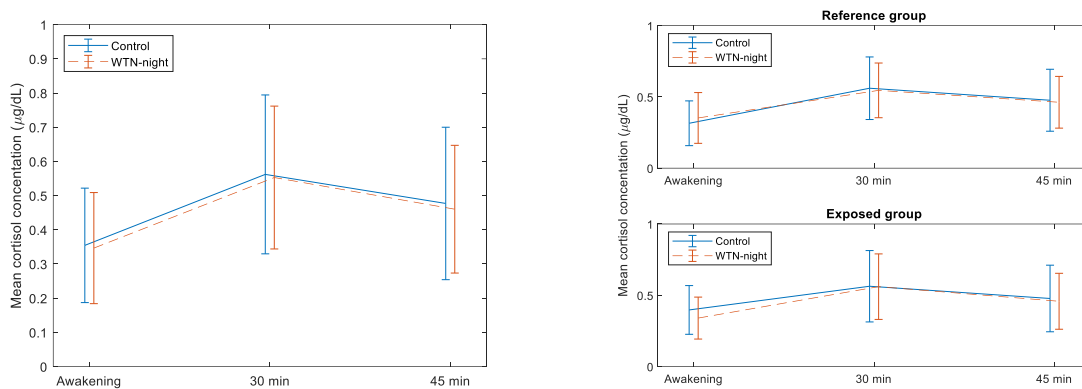

**Figure S2.** Cortisol awakening response. Left pane: mean cortisol concentrations for all study participants in each morning. Right pane: mean cortisol concentrations stratified by participant study group. Error bars indicate standard deviation. There were no statistically significant effects of study night or study group for any cortisol measures.

**Table S5.** Regression model results for effect of study night and study group on cortisol awakening response.

| Cortisol measure   | Participants (n) |           | Study night |         | Study group |         | Sex    |         | Noise sensitivity |         | Age    |         | Night $\times$ group p-value |
|--------------------|------------------|-----------|-------------|---------|-------------|---------|--------|---------|-------------------|---------|--------|---------|------------------------------|
|                    | Control          | WTN-night | F-stat      | p-value | F-stat      | p-value | F-stat | p-value | F-stat            | p-value | F-stat | p-value |                              |
| ACOR *             | 50 †             | 50 †      | 0.278       | 0.599   | 0.305       | 0.583   | 8.190  | 0.006   | 0.237             | 0.629   | 0.472  | 0.496   | 0.339                        |
| CAR <sub>auc</sub> | 50               | 50        | 0.053       | 0.819   | 0.176       | 0.677   | 9.342  | 0.004   | 0.339             | 0.563   | 0.105  | 0.747   | 0.635                        |
| CAR <sub>i</sub>   | 50               | 50        | 0.042       | 0.839   | 0.720       | 0.401   | 5.863  | 0.020   | 0.166             | 0.686   | 0.032  | 0.859   | 0.152                        |
| AINC               | 50               | 50        | 0.000       | 0.996   | 0.717       | 0.402   | 7.261  | 0.010   | 0.234             | 0.631   | 0.000  | 0.987   | 0.181                        |
| MINC               | 50               | 50        | 0.019       | 0.892   | 0.772       | 0.385   | 5.161  | 0.029   | 0.076             | 0.785   | 0.031  | 0.862   | 0.153                        |

ACOR: absolute cortisol concentration at 0, 30 and 45 minutes after awakening; CAR<sub>auc</sub>: overall volume of cortisol released given by the total area under the CAR curve; CAR<sub>i</sub>: change in overall volume of cortisol released relative to the waking value; AINC: absolute increase in cortisol, defined as the difference between the maximal value of post-awakening cortisol relative to the awakening value; MINC: difference between the mean values of post-awakening cortisol relative to the awakening value.

\* Measurement time (0, 30 and 45 minutes after awakening) also included as a covariate ( $F = 47.387$ ,  $p < 0.0001$ ). ACOR was positively skewed and square-root transformed before analysis.

† Three samples per participant

## Self-reported

**Figure S3.** Graphical representation of unadjusted means (bars) and standard deviations (error bars) in *Control* and *WTN-night* for each self-reported outcome. Figures on the left present data for all study participants, figure on the right present data stratified by participant study group. The ordinate is scaled from the minimum to the maximum of the response scale for each questionnaire item, except for “Probability of reporting difficulty falling back to sleep after an awakening” which is extended to encompass the standard deviation error bars. Effect of Study Night: \*  $p < 0.05$ ; \*\*  $p < 0.01$ ; \*\*\*  $p < 0.001$ . Effect of Study Group: †  $p < 0.05$ ; ††  $p < 0.01$ ; †††  $p < 0.001$ .

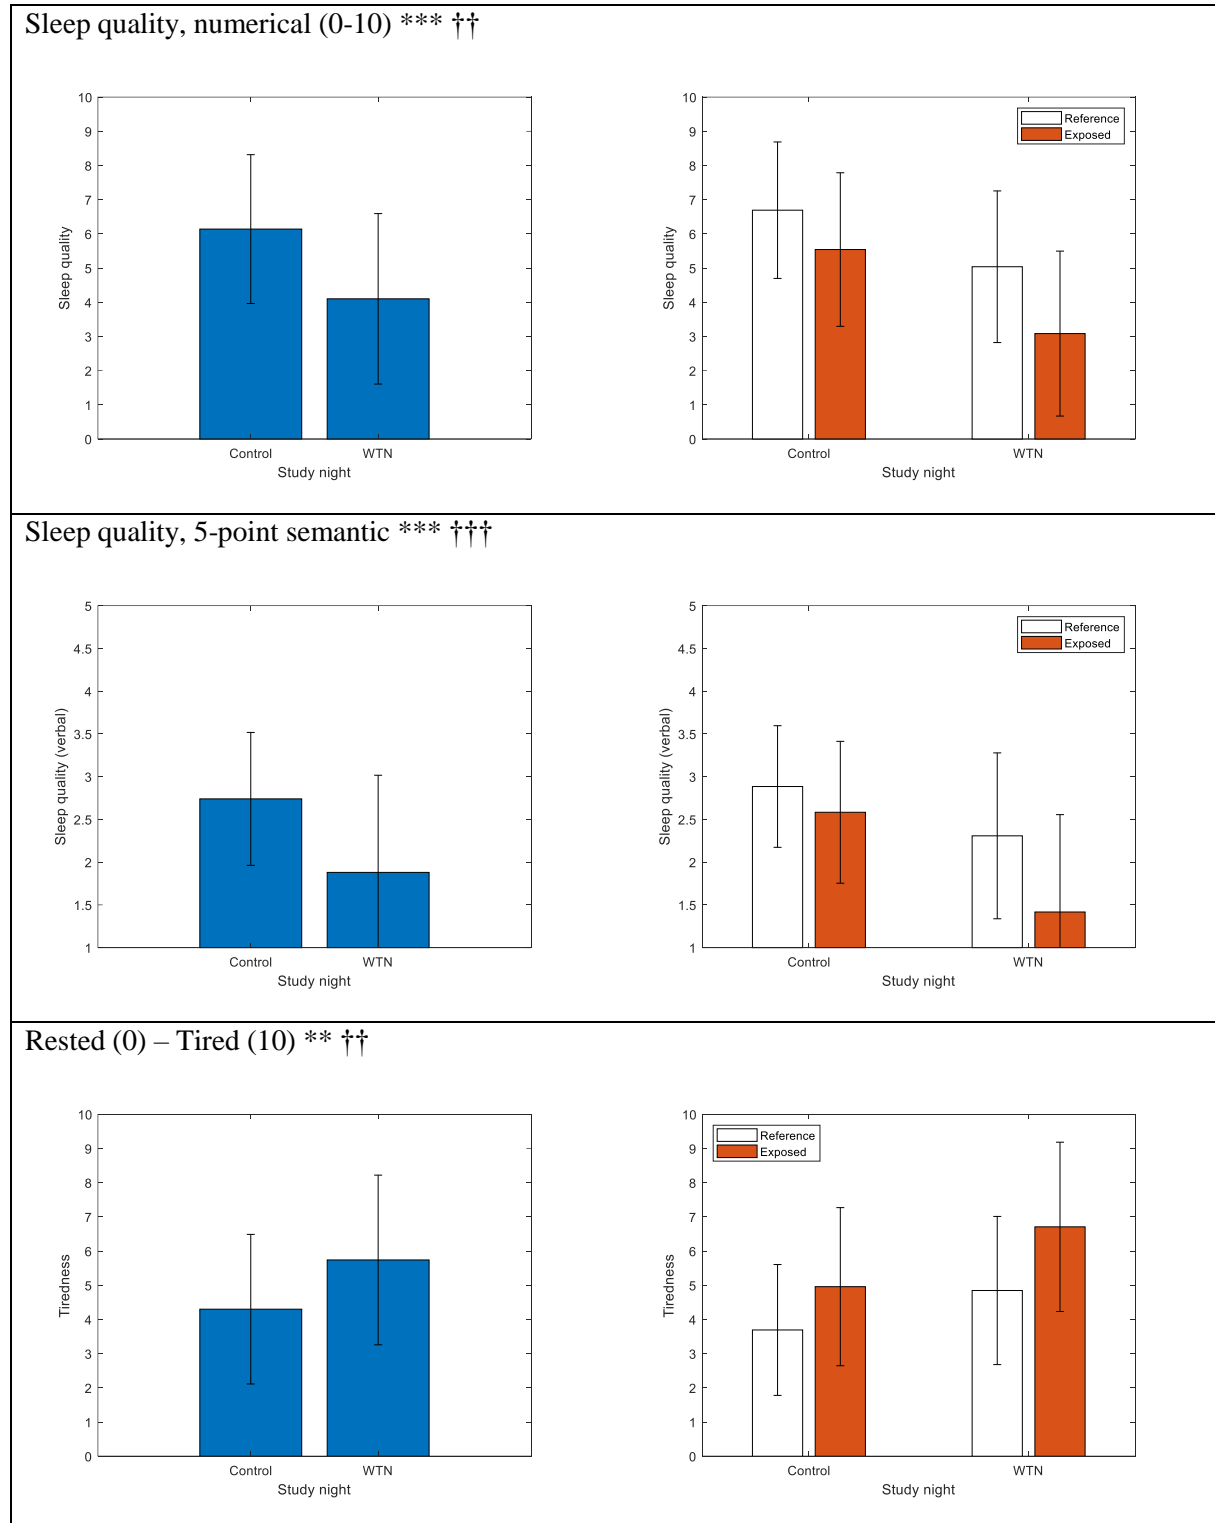

Relaxed (0) – Tense (10)

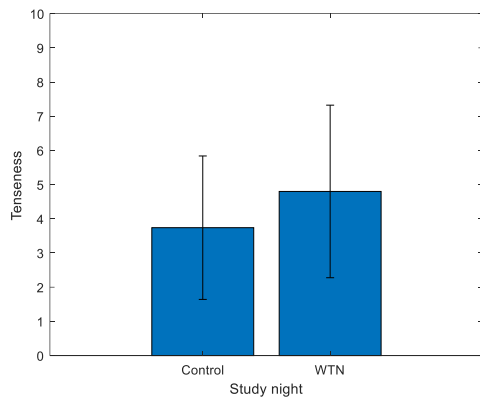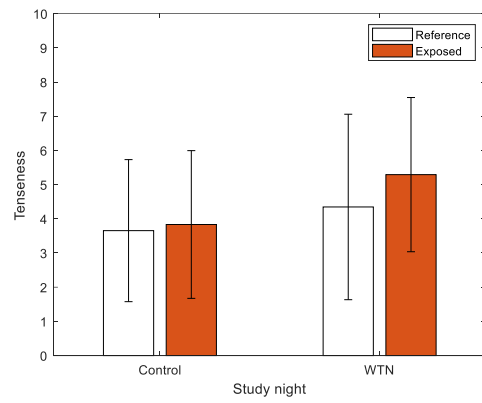

Glad (0) – Irritated (10) \*\*

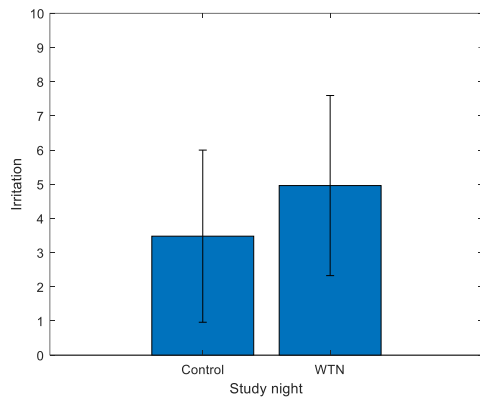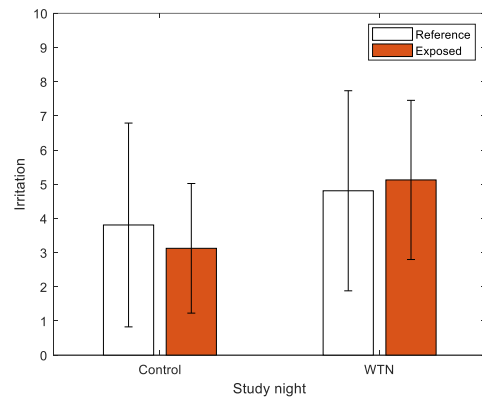

Probability of reporting difficulty falling back to sleep after an awakening \*

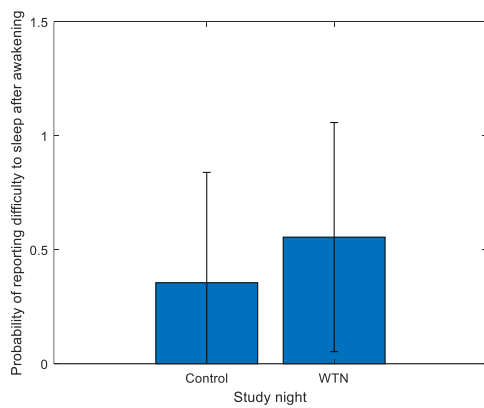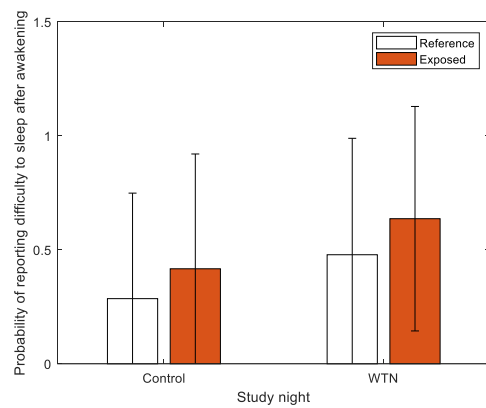

Easy to sleep (0) – Difficult to sleep (10) \*

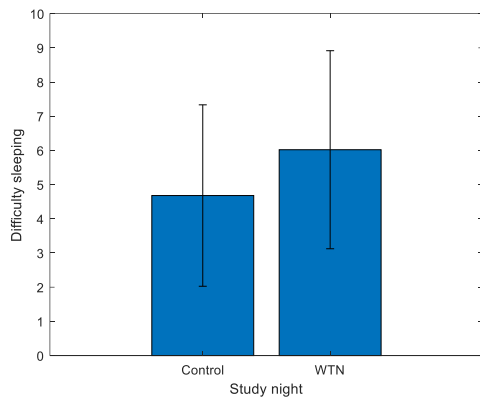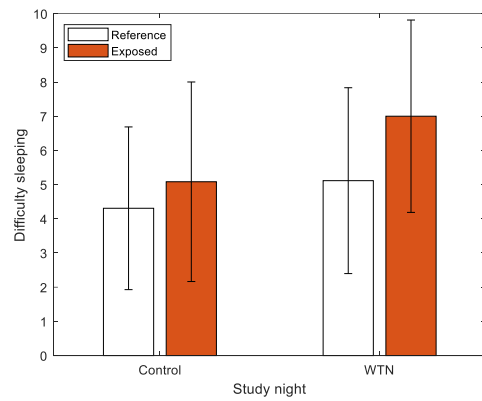

Better sleep than usual (0) – Worse sleep than usual (10) \*\*\* ††

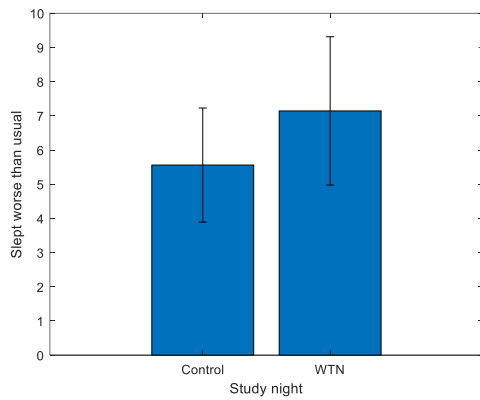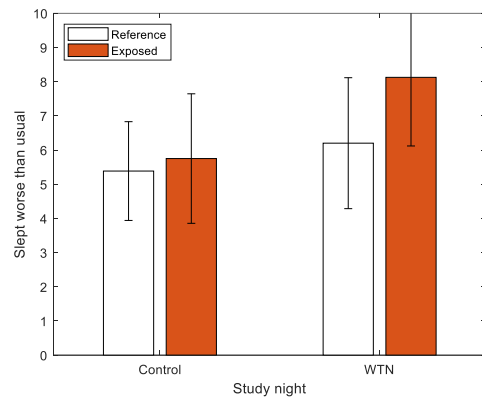

Sleep deeply (0) – Slept lightly (10)

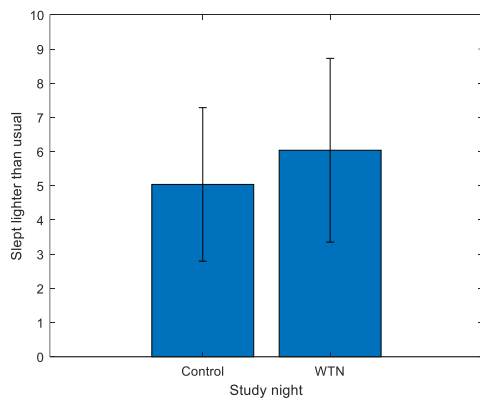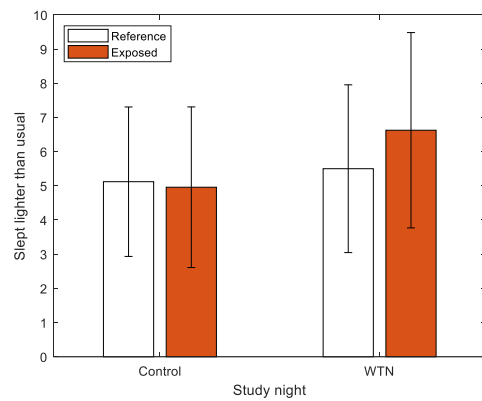



Never woke (0) – Woke often (10) \*\*

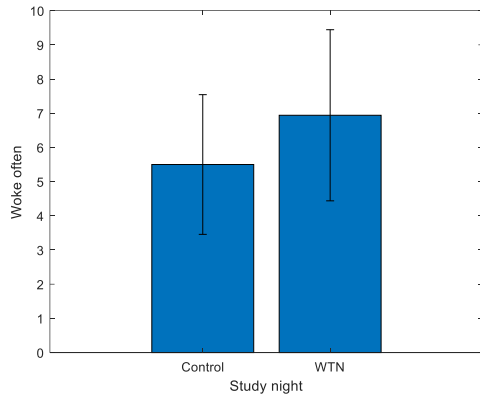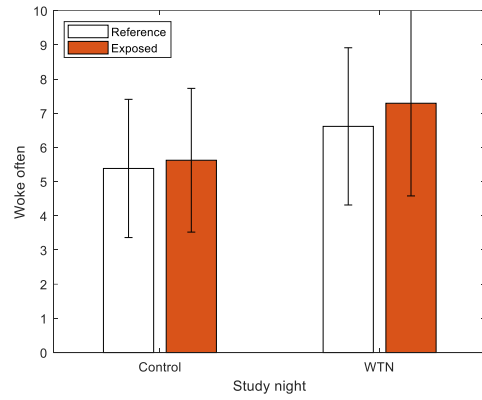

Sleep disturbance by WTN (0-10) \*\*\* †††

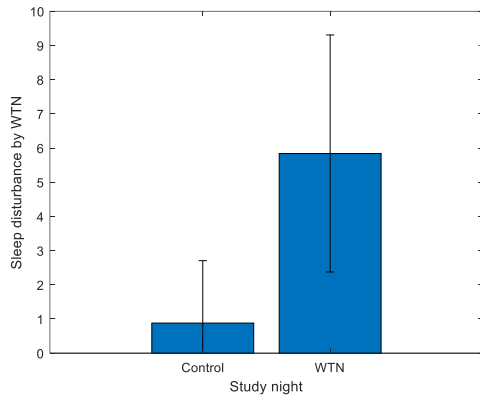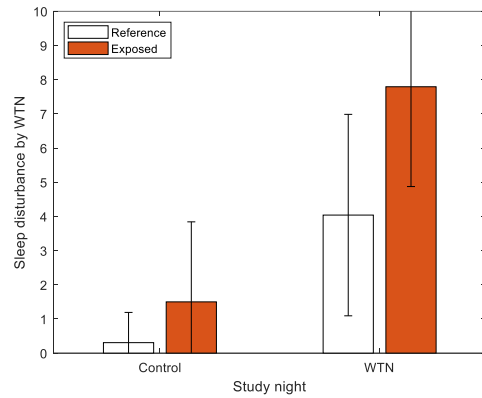

WTN caused poor sleep (5-point semantic) \*\*\* †††

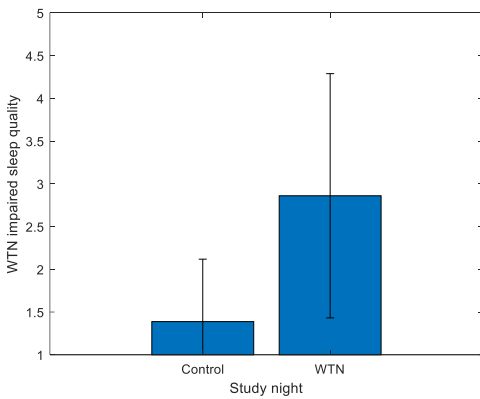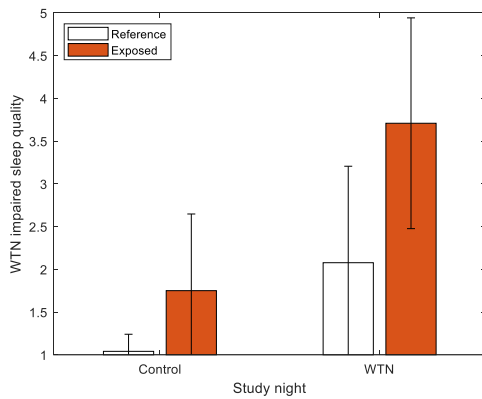

WTN caused awakenings (5-point semantic) \*\*\* †††

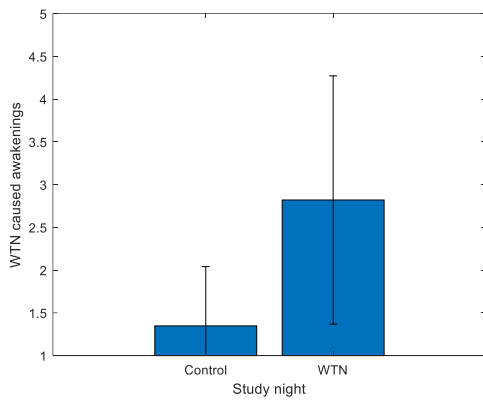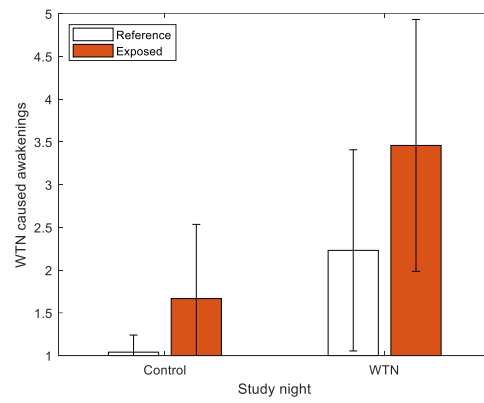

WTN caused difficulty falling asleep (5-point semantic) \*\*\* ††

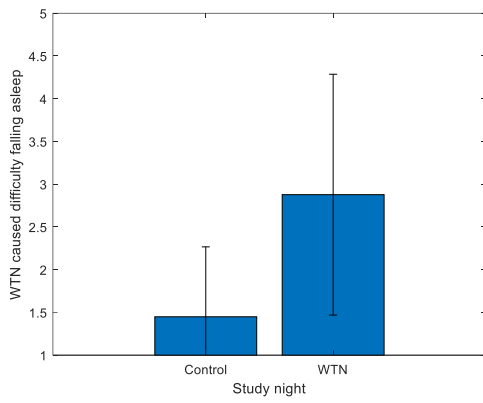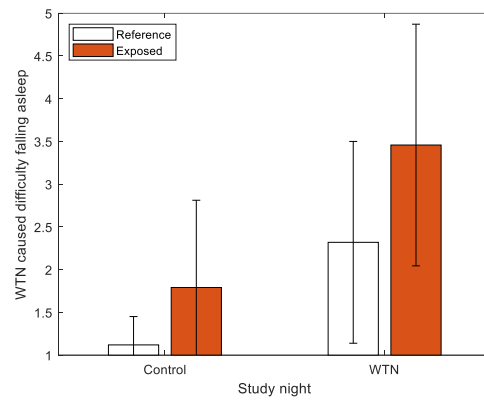

WTN caused tiredness in morning (5-point semantic) \*\*\* †††

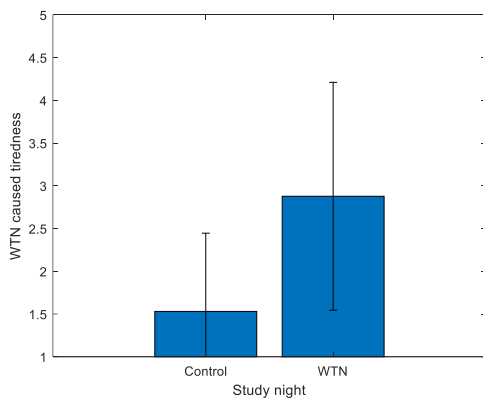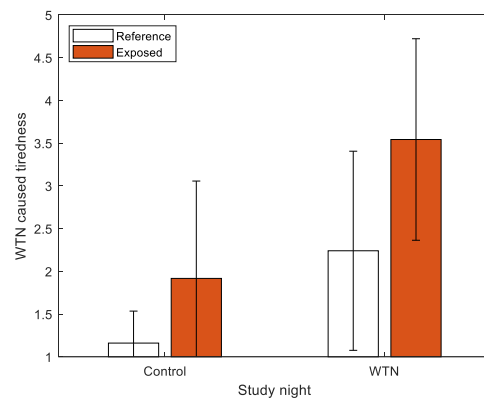

### Mood: Pleasantness (1-4) \*

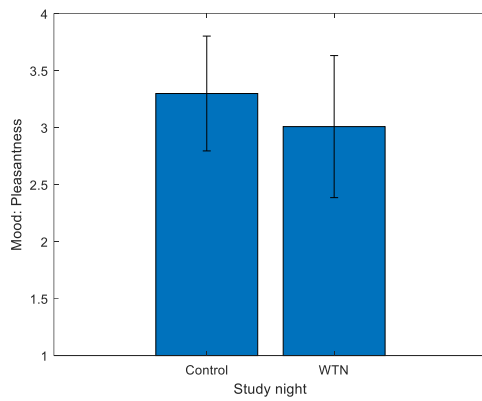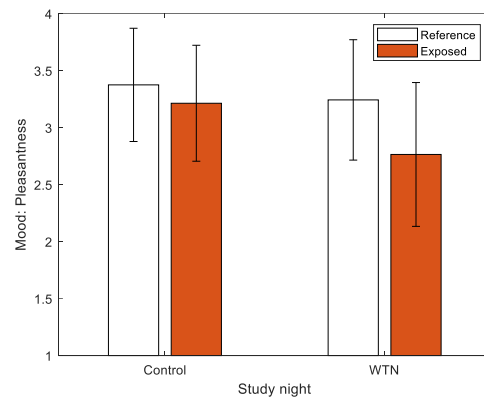

### Mood: Social orientation (1-4)

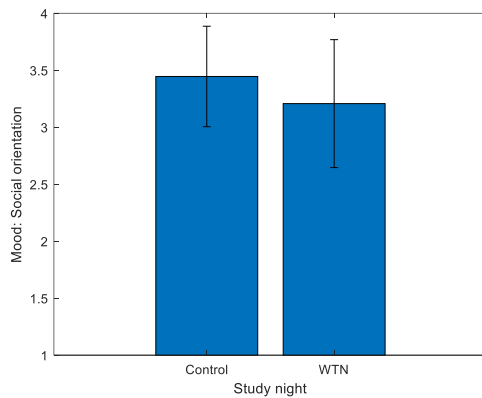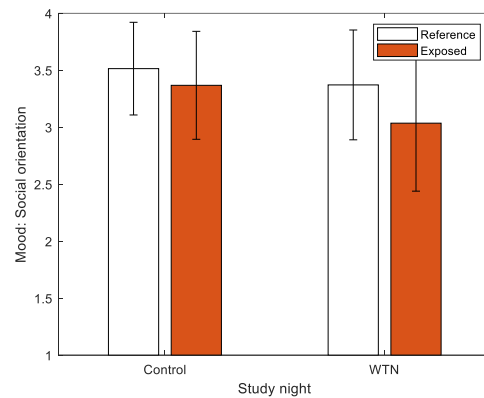

## Supplemental references

1. Akaike H. Information Theory and an Extension of the Maximum Likelihood Principle. In: Parzen E, Tanabe K, Kitagawa G, eds. *Selected Papers of Hirotugu Akaike*. New York, NY: Springer New York; 1998:199-213.
2. Burnham KP, Anderson DR. Multimodel inference - understanding AIC and BIC in model selection. *Sociol Method Res*. 2004;33(2):261-304.
3. FASS. [www.fass.se](http://www.fass.se). Accessed February, 2020.
